# Supplementary material
Source: publisher figshare collection journal article supplement (https://acs.figshare.com/ndownloader/files/24031854)
Supplement: Supplementary file 1 [file 24031854]

# Effect of urea as electrolyte additive for stabilization of lithium metal electrodes

*Hee-Sang Kim, Rakesh Verma, Jaekook Kim, and Chan-Jin Park \**

Department of Materials Science and Engineering, Chonnam National University, 77,

Yongbongro, Bukgu, Gwangju 61186, South Korea

**\* Corresponding author.**

Tel.: +82-62-530-1704. Fax: +82-62-530-1699.

E-mail address: parkcj@jnu.ac.kr (C.J. Park)

Number of pages: 11

Number of tables: 4

Number of figures: 7

**Table S1.** Fitted parameters based on equivalent circuit models (Fig.S2) that correspond to impedance of Li symmetric cell with 0.5 M urea additive.

| Sample                        | $R_s$        | $R_{SEI}$    | $CPE_{SEI}$           |           | $R_{ct}$     | $CPE_{dl}$            |          |
|-------------------------------|--------------|--------------|-----------------------|-----------|--------------|-----------------------|----------|
|                               | ( $\Omega$ ) | ( $\Omega$ ) | $C_{SEI}(F)$          | $n_{SEI}$ | ( $\Omega$ ) | $C_{dl}(F)$           | $n_{dl}$ |
| After 1 <sup>st</sup> cycle   | 7.52         | 1127.2       | $9.94 \times 10^{-4}$ | 0.638     | 858.7        | $1.03 \times 10^{-5}$ | 0.790    |
| After 5 <sup>th</sup> cycles  | 8.28         | 22.58        | $6.96 \times 10^{-5}$ | 0.770     | 51.0         | $4.39 \times 10^{-6}$ | 0.889    |
| After 10 <sup>th</sup> cycles | 8.28         | 22.56        | $6.97 \times 10^{-5}$ | 0.770     | 51.1         | $4.38 \times 10^{-6}$ | 0.890    |
| After 50 <sup>th</sup> cycles | 8.87         | 16.18        | $2.56 \times 10^{-5}$ | 0.797     | 6.00         | $7.26 \times 10^{-6}$ | 1.021    |

**Table S2.** Fitted parameters based on equivalent circuit models (Fig. S2) that correspond to impedance of Li symmetric cell without 0.5 M urea additive.

| Sample                        | $R_s$        | $R_{SEI}$    | $CPE_{SEI}$           |           | $R_{ct}$     | $CPE_{dl}$            |          |
|-------------------------------|--------------|--------------|-----------------------|-----------|--------------|-----------------------|----------|
|                               | ( $\Omega$ ) | ( $\Omega$ ) | $C_{SEI}(F)$          | $n_{SEI}$ | ( $\Omega$ ) | $C_{dl}(F)$           | $n_{dl}$ |
| After 1 <sup>st</sup> cycle   | 10.08        | 19.66        | $3.37 \times 10^{-2}$ | 0.448     | 19.86        | $2.18 \times 10^{-5}$ | 0.829    |
| After 5 <sup>th</sup> cycles  | 6.46         | 22.48        | $1.99 \times 10^{-4}$ | 0.545     | 9.60         | $5.92 \times 10^{-2}$ | 0.736    |
| After 10 <sup>th</sup> cycles | 64.62        | 867.0        | $8.59 \times 10^{-6}$ | 0.445     | 834.11       | $2.96 \times 10^{-2}$ | 0.157    |



**Table S3.** Binding energies of C 1s, O 1s F 1s, S2p3/2, and N 1s analogous to the fitted peaks of the Li electrode from the Li symmetric cell.

| Components                                    | Binding energy (eV) |       |       |        |       |
|-----------------------------------------------|---------------------|-------|-------|--------|-------|
|                                               | C1s                 | O1s   | F1s   | S2p3/2 | N1s   |
| Hydrocarbon                                   | 285                 |       |       |        |       |
| LiTFSI                                        | 292.6               |       | 688.5 | 168.7  | 399.4 |
| Li <sub>2</sub> O                             |                     | 528.8 |       |        |       |
| LiF                                           |                     |       | 684.9 |        |       |
| Li <sub>3</sub> N                             |                     |       |       |        | 397   |
| Li <sub>2</sub> S                             |                     |       |       | 161.2  |       |
| Li <sub>2</sub> S <sub>2</sub> O <sub>4</sub> |                     |       |       | 166.2  |       |
| Li <sub>2</sub> SO <sub>4</sub>               |                     |       |       | 169.7  |       |
| Polysulfur                                    |                     |       |       | 163.8  |       |
| Li <sub>2</sub> CO <sub>3</sub>               | 290.3               | 531.8 |       |        |       |
| -COO                                          | 287-288             | 532.3 |       |        |       |
| C=O                                           | 286.1-<br>287.1     | 533.6 |       |        |       |
| (NH <sub>2</sub> ) <sub>2</sub> CO            | 288.7               | 535.0 |       |        | 399.5 |

**Table S4.** Vibrational frequencies and assignments for bis(trifluoromethane sulfonyl)imide lithium salt (LiTFSI) and urea.

| LiTFSI                                 |                               | Urea                                   |                               |
|----------------------------------------|-------------------------------|----------------------------------------|-------------------------------|
| Wavenumber<br>r<br>(cm <sup>-1</sup> ) | Vibrational<br>mode           | Wavenumber<br>r<br>(cm <sup>-1</sup> ) | Vibrational<br>mode           |
| 2876                                   | $\nu$ S-CF <sub>3</sub>       | 3430                                   | $\nu$ N-H                     |
| 1325                                   | $\nu$ C-SO <sub>2</sub> -N    | 3332                                   | $\nu_{as}$ NH <sub>2</sub>    |
| 1244                                   | $\nu_{as}$ SO <sub>2</sub>    | 3256                                   | $\nu_s$ NH <sub>2</sub>       |
| 1198                                   | $\nu_{as}$ CF                 | 1675                                   | $\delta_s$ NH <sub>2</sub>    |
| 1141                                   | $\nu$ C-SO <sub>2</sub> -N    | 1619                                   | $\delta_{as}$ NH <sub>2</sub> |
| 1061                                   | $\nu_{as}$ S-N-S              | 1590                                   | $\nu_s$ C=O                   |
| 811                                    | $\delta_s$ CF <sub>3</sub>    | 1458                                   | $\nu$ C-N                     |
| 747                                    | $\nu$ S-N                     |                                        |                               |
| 635                                    | $\delta_s$ O-S-O              |                                        |                               |
| 572                                    | $\delta_{as}$ CF <sub>3</sub> |                                        |                               |
| 512                                    | $\delta_{as}$ O-S-O           |                                        |                               |

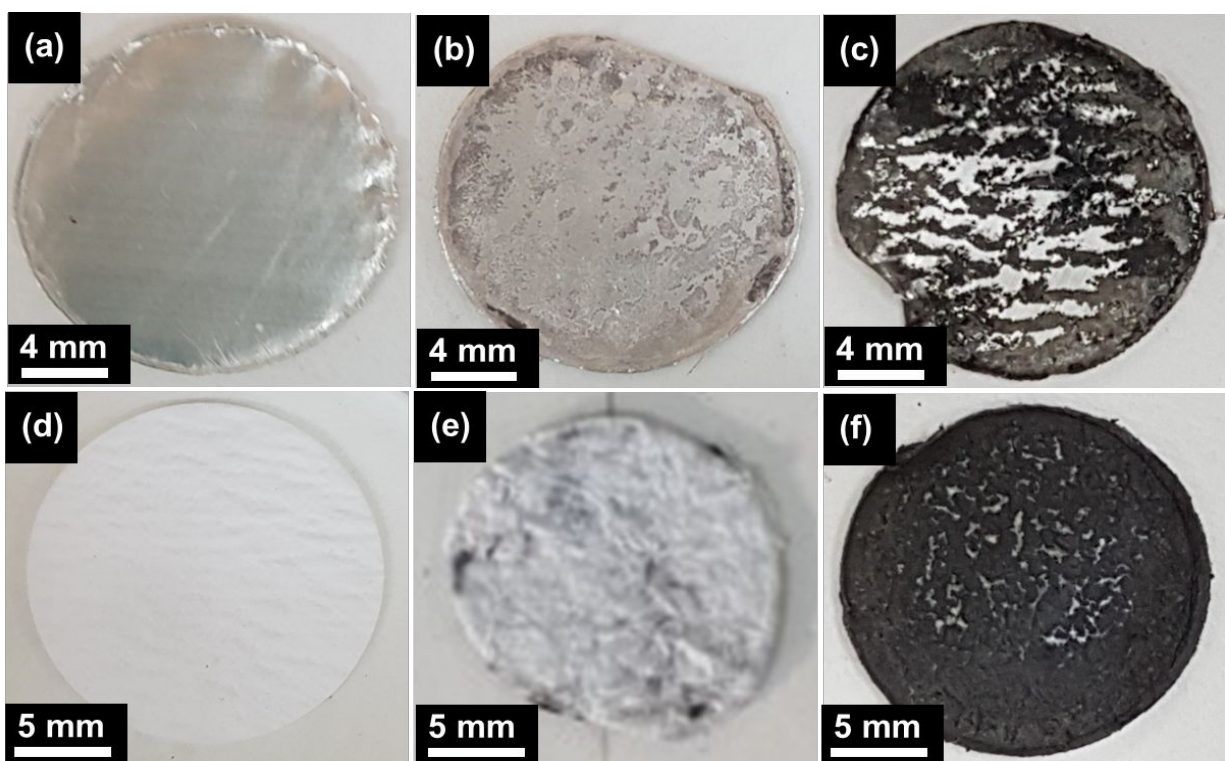

**Figure S1.** Typical images of components of Li symmetric cells: (a) pristine Li metal; Li metals from cells (b) with and (c) without 0.5 M urea additive; (d) pristine separator; (e) separator from cells (e) with and (f) without 0.5 M urea additive. The cells were cyclic tested for 10 cycles at current density of  $1.0 \text{ mA cm}^{-2}$ ; each discharge-charge cycle lasted 2 h.

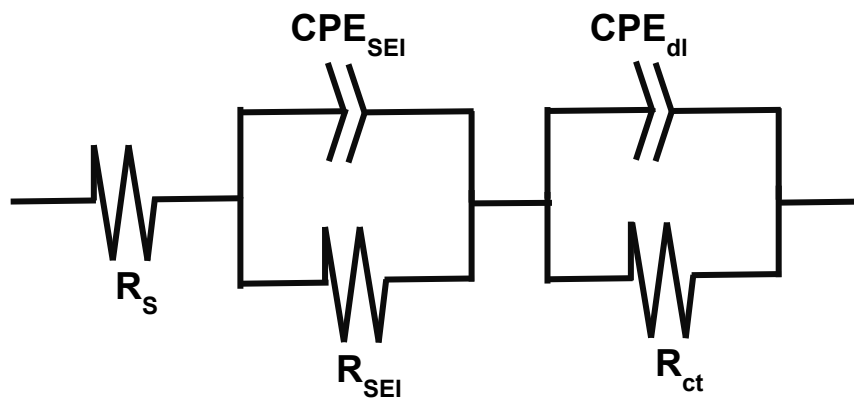

**Figure S2.** Equivalent circuit for electrochemical impedance spectroscopy curve of Li/Li symmetric cell. Here,  $R_s$ ,  $R_{SEI}$ , and  $R_{ct}$  denote the electrolyte resistance, solid electrolyte interphase (SEI) layer resistance attributed to reaction products found on the surface of Li electrode, and charge transfer resistance, respectively; and  $CPE_{SEI}$  and  $CPE_{dl}$  denote the corresponding constant phase elements.



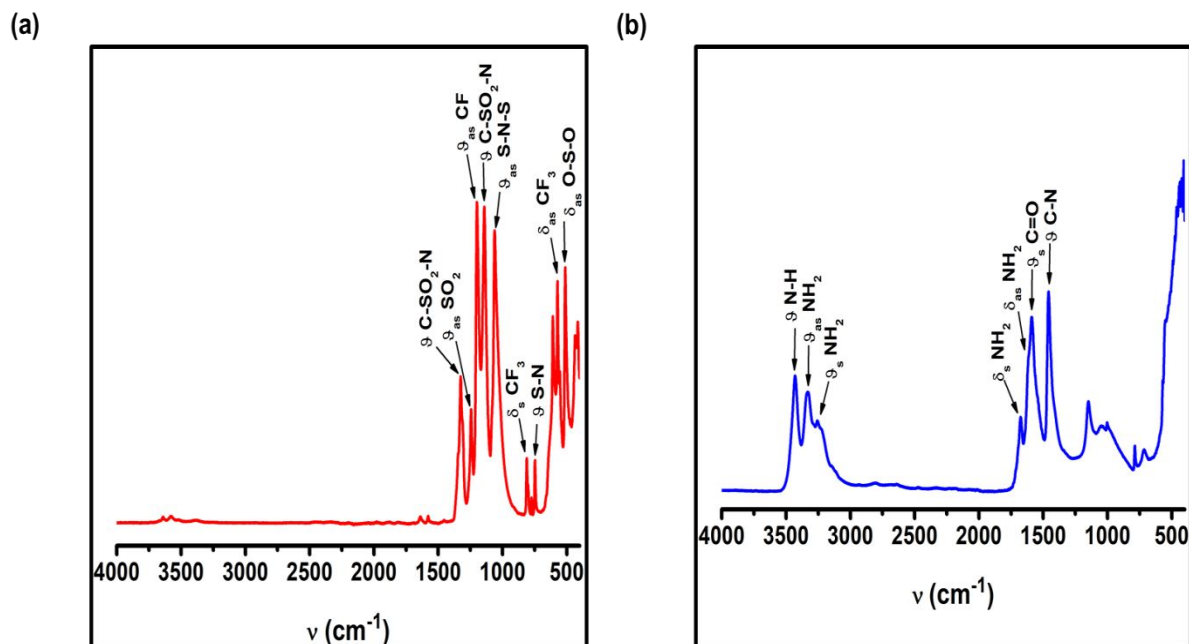

**Figure S3.** Fourier-transform infrared spectra of (a) pure bis(trifluoromethane sulfonyl)imide lithium salt and (b) urea.

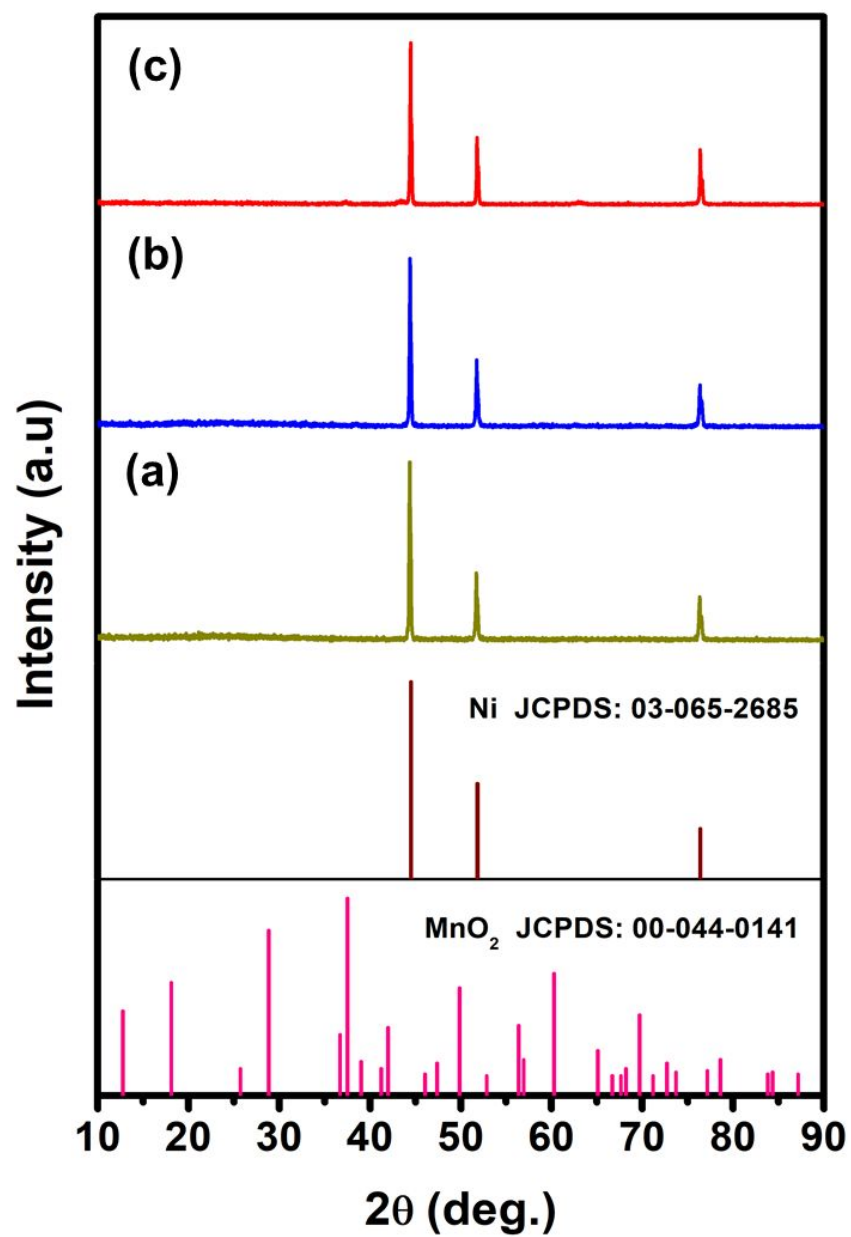

**Figure S4.** X-ray diffraction patterns of MnO<sub>2</sub> catalyst formed on Ni foam: (a) fresh Ni foam, (b) before annealing, and (c) after annealing at 450 °C for 5 h.

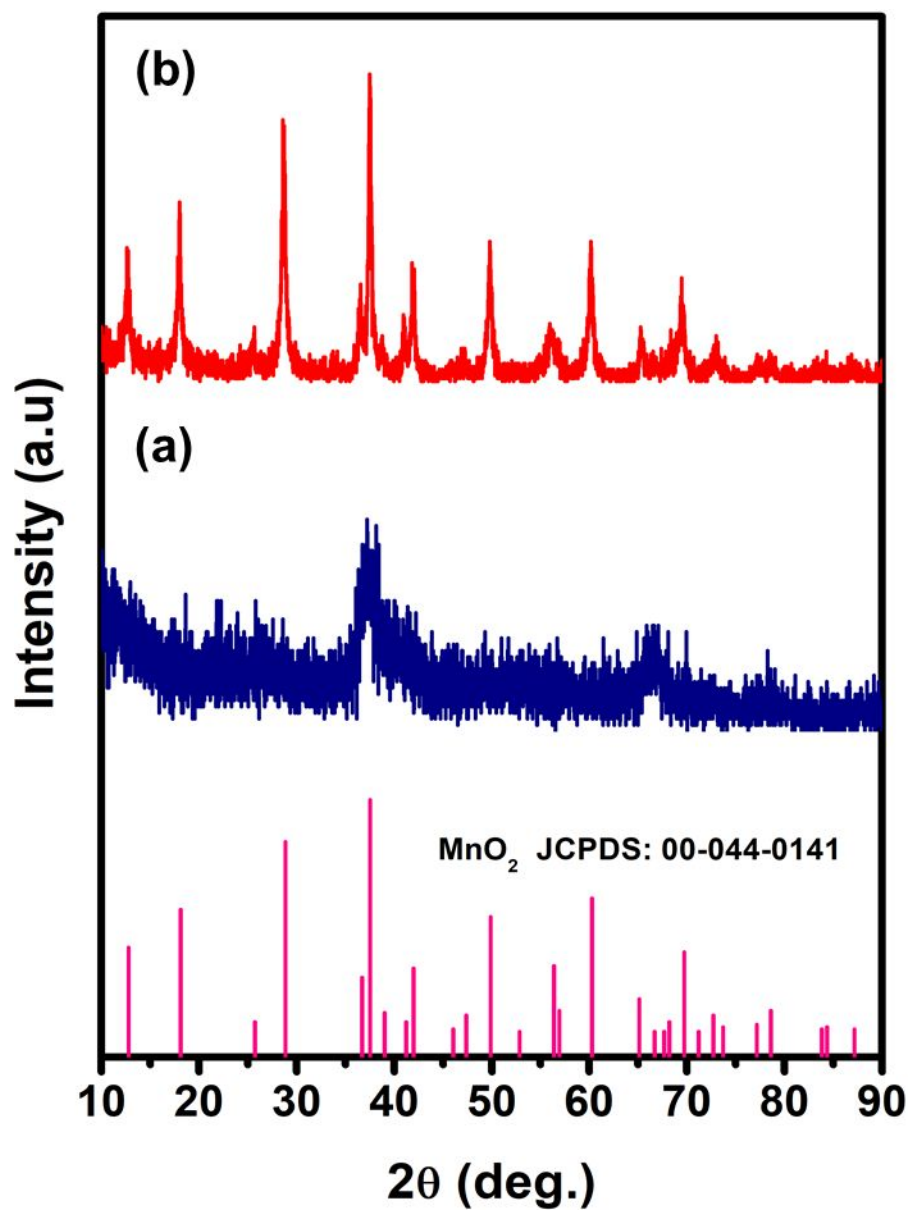

**Figure S5.** X-ray diffraction patterns of  $\text{MnO}_2$  powder obtained via hydrothermal method:

(a) before annealing, and (b) after annealing at  $450^\circ\text{C}$  for 5 h.

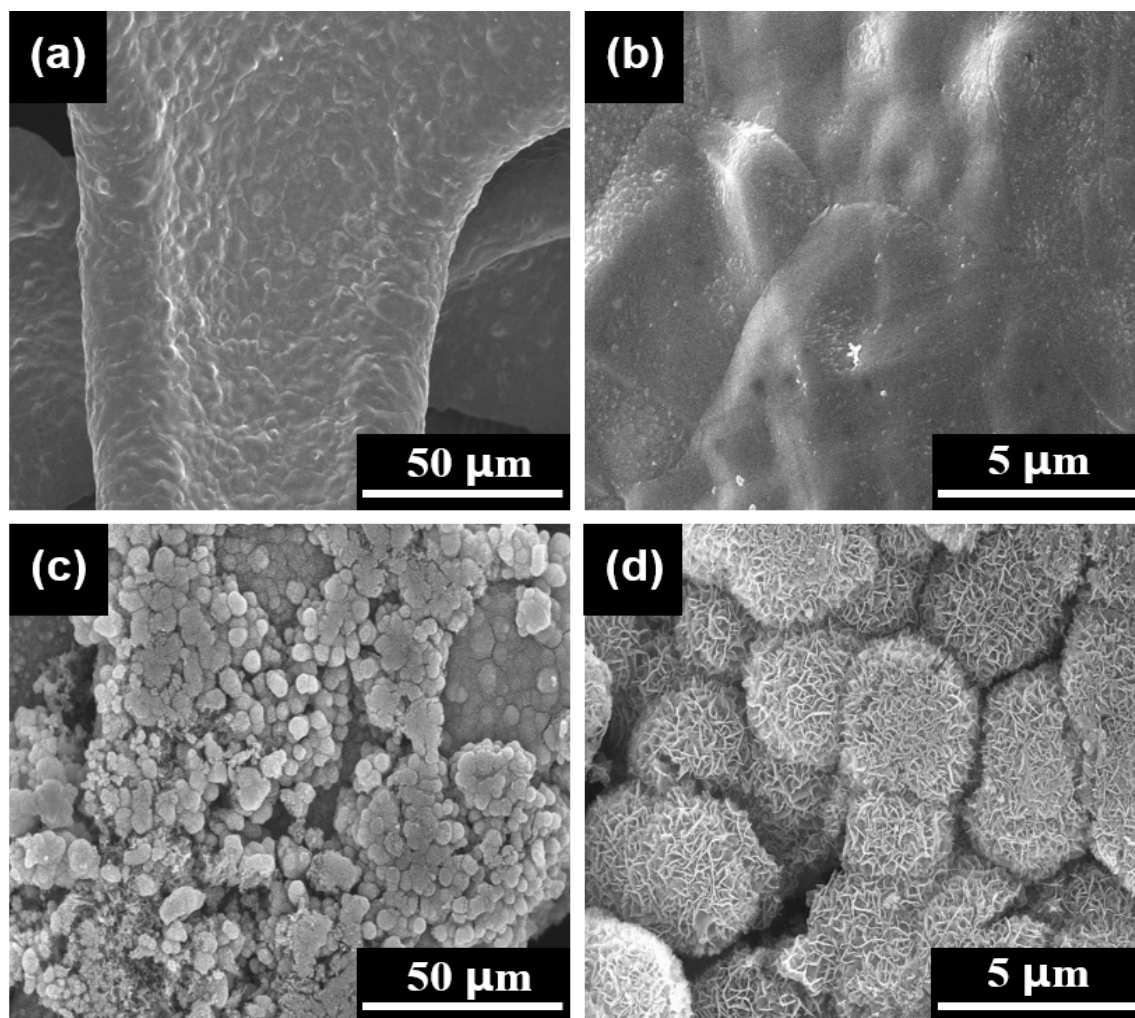

**Figure S6.** (a) Low- and (b) high-magnification scanning electron microscopy (SEM) images of fresh Ni foam. (c) Low- and (d) high-magnification SEM images of MnO<sub>2</sub> catalyst formed on Ni foam.

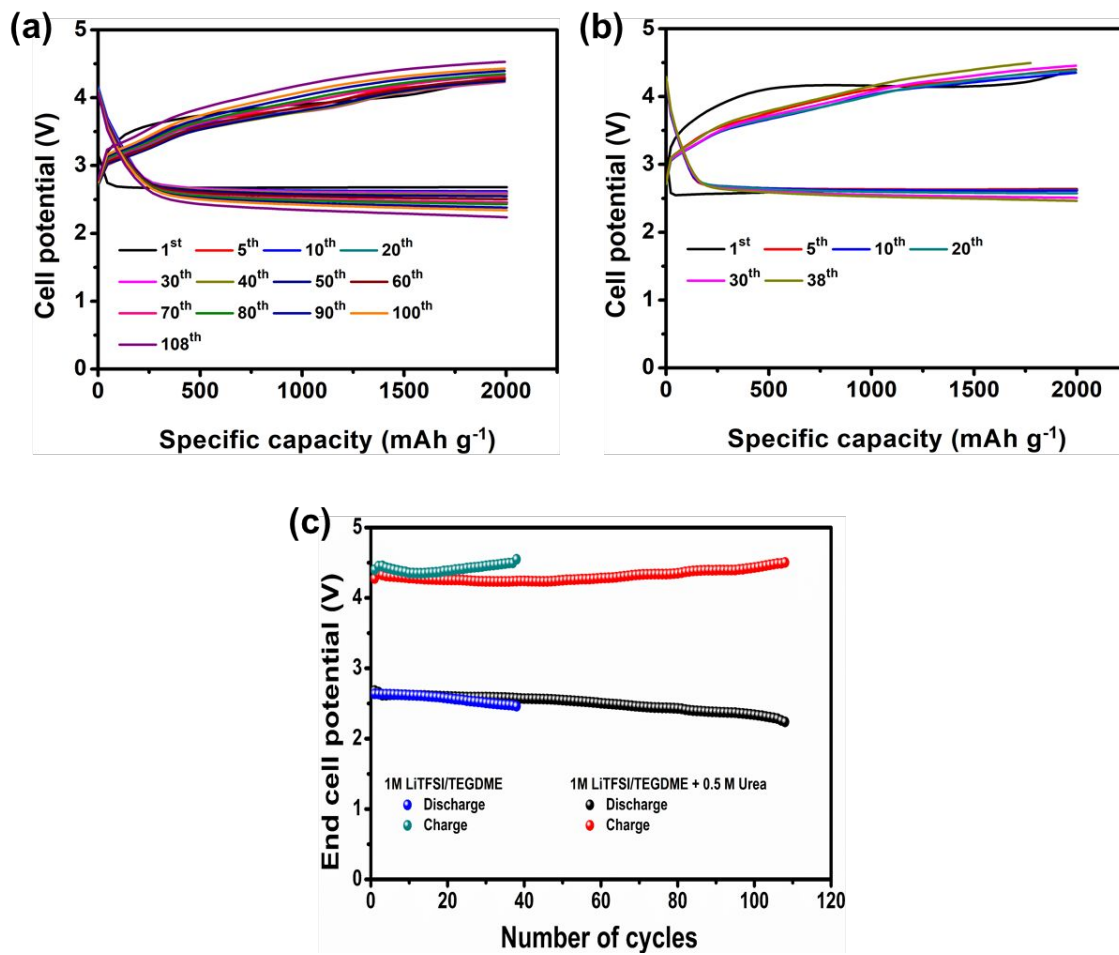

**Figure S7.** (a) and (b) Discharge-charge potential profiles of Li-O<sub>2</sub> batteries with and without urea additive. (c) Variation of end cell potential with cycle number of Li-O<sub>2</sub> batteries with and without urea electrolyte additive. Measurements were carried out in limited capacity mode: 2000 mAh g<sup>-1</sup> and 0.2 mA cm<sup>-2</sup> in pure O<sub>2</sub> atmosphere. Here,

LiTFSI and TEGDME denote bis(trifluoromethane sulfonyl)imide lithium salt and tetraethylene glycol dimethyl ether, respectively.
